# Supplementary material for: Combination of Type I and II tyrosine kinase inhibitors—avapritinib and sunitinib—in refractory gastrointestinal stromal tumor after failure to multi-line therapy: a case report
Source: PubMed Central journal article supplement — Ann Transl Med. 2022 Sep;10(18):1026. doi: 10.21037/atm-22-3746 (PMC9577760; doi:10.21037/atm-22-3746), 2022-09
Supplement: atm-10-18-1026-rc.pdf [file atm-10-18-1026-rc.pdf]

| Topic                         | Item No | Checklist item description                                                                                                                                                     | Reported on Page Number/Line Number | Reported on Section/Paragraph      |
|-------------------------------|---------|--------------------------------------------------------------------------------------------------------------------------------------------------------------------------------|-------------------------------------|------------------------------------|
| Title                         | 1       | The diagnosis or intervention of primary focus followed by the words "case report"                                                                                             | page 1 line3-5                      | Title/paragraph 1                  |
| Key Words                     | 2       | 2 to 5 key words that identify diagnoses or interventions in this case report, including "case report"                                                                         | page 2 line 1 8 -19                 | Key Words /paragraph 1             |
| Abstract (Structured summary) | 3a      | Background: state what is known and unknown; why the case report is unique and what it adds to existing literature.                                                            | page 1 line25-30                    | Abstract /paragraph 1              |
|                               | 3b      | Case Description: describe the patient's demographic details, main symptoms, history, important clinical findings, the main diagnosis, interventions, outcomes and follow-ups. | page 1 line31-page 2 line12         | Abstract /paragraph 2              |
|                               | 3c      | Conclusions: summarize the main take-away lesson, clinical impact and potential implications.                                                                                  | page 2 line13-line16                | Abstract /paragraph 3              |
| Introduction                  | 4       | One or two paragraphs summarizing why this case is unique ( <b>may include references</b> )                                                                                    | page 3 line12-line20                | Introduction /paragraph 3          |
| Patient Information           | 5a      | De-identified patient specific information                                                                                                                                     | page 3 line24-27                    | Case presentation / paragraph 1    |
|                               | 5b      | Primary concerns and symptoms of the patient                                                                                                                                   | page 3 line24-27                    | Case presentation / paragraph 1    |
|                               | 5c      | Medical, family, and psycho-social history including relevant genetic information                                                                                              | page 3 line24-page 6 line2          | Case presentation / paragraph 1-10 |
|                               | 5d      | Relevant past interventions with outcomes                                                                                                                                      | page 3 line27-page 5 line34         | Case presentation / paragraph 1-9  |
| Clinical Findings             | 6       | Describe significant physical examination (PE) and important clinical findings                                                                                                 | page 3 line27-page 5 line34         | Case presentation / paragraph 1-9  |
| Timeline                      | 7       | Historical and current information from this episode of care organized as a timeline                                                                                           | page 6 line1-2&page 8 line6-10      | Case presentation / paragraph 1 0  |
| Diagnostic Assessment         | 8a      | Diagnostic testing (such as PE, laboratory testing, imaging, surveys).                                                                                                         | page 3 line24-page 6 line2          | Case presentation / paragraph 1-10 |
|                               | 8b      | Diagnostic challenges (such as access to testing, financial, or cultural)                                                                                                      | page 3 line24-page 6 line2          | Case presentation / paragraph 1-10 |
|                               | 8c      | Diagnosis (including other diagnoses considered)                                                                                                                               | page 3 line24-page 6 line2          | Case presentation / paragraph 1-10 |
|                               | 8d      | Prognosis (such as staging in oncology) where applicable                                                                                                                       | page 3 line24-page 6 line2          | Case presentation / paragraph 1-10 |
| Therapeutic Intervention      | 9a      | Types of therapeutic intervention (such as pharmacologic, surgical, preventive, self-care)                                                                                     | page 3 line24-page 6 line2          | Case presentation / paragraph 1-10 |
|                               | 9b      | Administration of therapeutic intervention (such as dosage, strength, duration)                                                                                                | page 3 line24-page 6 line2          | Case presentation / paragraph 1-10 |
|                               | 9c      | Changes in therapeutic intervention (with rationale)                                                                                                                           | page 3 line24-page 6 line2          | Case presentation / paragraph 1-10 |

|                        |     |                                                                                                        |                                                 |                                                      |
|------------------------|-----|--------------------------------------------------------------------------------------------------------|-------------------------------------------------|------------------------------------------------------|
| Follow-up and Outcomes | 10a | Clinician and patient-assessed outcomes (if available)                                                 | page 3 line24-page 6 line2                      | Case presentation / paragraph 1-10                   |
|                        | 10b | Important follow-up diagnostic and other test results                                                  | page 3 line24-page 6 line2                      | Case presentation / paragraph 1-10                   |
|                        | 10c | Intervention adherence and tolerability (How was this assessed?)                                       | page 3 line24-page 6 line2                      | Case presentation / paragraph 1-10                   |
|                        | 10d | Adverse and unanticipated events                                                                       | page 3 line24-page 6 line2                      | Case presentation / paragraph 1-10                   |
| Discussion             | 11a | A scientific discussion of the strengths AND limitations associated with this case report              | page 7 line25- page 8 line29                    | Discussion/ paragraph 6-8 & Conclusions/ paragraph 1 |
|                        | 11b | Discussion of the relevant medical literature <b>with references</b>                                   | page 6 line19 - page 7 line21& page 7 line30-34 | Discussion/ paragraph 2 -4&6                         |
|                        | 11c | The scientific rationale for any conclusions (including assessment of possible causes)                 | page 8 line24-29                                | Conclusions/ paragraph 1                             |
|                        | 11d | The primary “take-away” lessons of this case report (without references) in a one paragraph conclusion | page 8 line24-29                                | Conclusions/ paragraph 1                             |
| Patient Perspective    | 12  | The patient should share their perspective in one to two paragraphs on the treatment(s) they received  | NA                                              | NA                                                   |
| Informed Consent       | 13  | Did the patient give informed consent? Please provide if requested                                     | Yes <input checked="" type="checkbox"/>         | No <input type="checkbox"/>                          |

Article information: <https://dx.doi.org/10.21037/atm-22-3746>

\*As the checklist was provided upon initial submission, the page number/line number reported may be changed due to copy editing and may not be referable in the published version. In this case, the section/paragraph may be used as an alternative reference.
